# Supplementary material
Source: PubMed Central journal article supplement (PMC5870669)
Supplement: proof-sd-corrected_btx358.pdf [file proof-sd-corrected_btx358.pdf]

# Supplementary Data

## **Glycan Reader is Improved to Recognize Most Sugar Types and Chemical Modifications in the Protein Data Bank**

Sang-Jun Park, Jumin Lee, Dhilon S. Patel, Hongjing Ma, Hui Sun Lee, Sunhwan Jo, and  
Wonpil Im

**Table S1.** Monosaccharides recognized by *Glycan Reader*.

|        | <b>Abbreviation</b> | <b>Full Name</b>                    | <b>CHARMM Residue Name<sup>†</sup></b> |
|--------|---------------------|-------------------------------------|----------------------------------------|
| Hex    | Glc                 | D/L-Glucose                         | GLC                                    |
|        | Man                 | D/L-Mannose                         | MAN                                    |
|        | Gal                 | D/L-Galactose                       | GAL, GALF                              |
|        | Gul                 | D/L-Gulose                          | GUL                                    |
|        | Alt                 | D/L-Altrose                         | ALT                                    |
|        | All                 | D/L-Allose                          | ALL                                    |
|        | Tal                 | D/L-Talose                          | TAL                                    |
|        | Ido                 | D/L-Idose                           | IDO                                    |
| HexN   | GlcN                | D-Glucosamine                       | GLCN                                   |
|        | ManN                | D-Mannosamine                       | MANN                                   |
|        | GalN                | D-Galactosamine                     | GALN                                   |
|        | GulN                | D-Gulosamine                        | GULN                                   |
|        | AltN                | D-Altrosamine                       | ALTN                                   |
|        | AllN                | D-Allosamine                        | ALLN                                   |
|        | TalN                | D-Talosamine                        | TALN                                   |
|        | IdoN                | D-Idosamine                         | IDON                                   |
| HexNAc | GlcNAc              | <i>N</i> -acetyl- D/L-Glucosamine   | GLCNA                                  |
|        | ManNAc              | <i>N</i> -acetyl- D/L-Mannosamine   | MANNA                                  |
|        | GalNAc              | <i>N</i> -acetyl- D/L-Galactosamine | GALNA                                  |
|        | GulNAc              | <i>N</i> -acetyl- D/L-Gulosamine    | GULNA                                  |
|        | AltNAc              | <i>N</i> -acetyl- D/L-Altrosamine   | ALTNA                                  |
|        | AllNAc              | <i>N</i> -acetyl- D-Allosamine      | ALLNA                                  |
|        | TalNAc              | <i>N</i> -acetyl- D/L-Talosamine    | TALNA                                  |
|        | IdoNAc              | <i>N</i> -acetyl-L-Idosamine        | IDONA                                  |
| HexA   | GlcA                | D-Glucuronic acid                   | GLCA                                   |
|        | ManA                | D-Mannuronic acid                   | MANA                                   |
|        | GalA                | D-Galacturonic acid                 | GALA                                   |
|        | GulA                | D/L-Guluronic acid                  | GULA                                   |
|        | AltA                | D/L-Altruronic acid                 | ALTA                                   |
|        | AllA                | D-Alluronic acid                    | ALLA                                   |
|        | TalA                | D-Taluronic acid                    | TALA                                   |
|        | IdoA                | L-Iduronic acid                     | IDOA                                   |
| Deoxy  | Qui                 | D-Quinovose                         | QUI                                    |
|        | Rha                 | D/L-Rhamnose                        | RHM                                    |
|        | Fuc                 | D/L-Fucose                          | FUC                                    |
|        | QuiNAc              | <i>N</i> -acetyl-D-Quinovose        | QUINA                                  |
|        | RhaNAc              | <i>N</i> -acetyl-L-Rhamnose         | RHMNA                                  |
|        | FucNAc              | <i>N</i> -acetyl-L-Fucose           | FUCNA                                  |
|        | 6dAlt               | L-6-deoxy-Altrose                   | L6ALT                                  |

|         |          |                                         |                |
|---------|----------|-----------------------------------------|----------------|
|         | 6dTal    | L-6-deoxy-Talose                        | L6TAL          |
|         | Oli      | D-Olivose                               | OLI            |
|         | Tyv      | D-Tyvelose                              | TYV            |
|         | Abe      | D-Abequose                              | BEQ            |
|         | Par      | D-Paratose                              | PAR            |
|         | Dig      | D-Digitoxose                            | DIG            |
|         | Col      | L-Colitose                              | COL            |
| Pentose | Ara      | D/L-Arabinose                           | ARB, ARBP      |
|         | Lyx      | D-Lyxose                                | LYF, LYXP      |
|         | Xyl      | D/L-Xylose                              | XYF, XYL, XULF |
|         | Rib      | D/L-Ribose                              | RIB, RIBP, DEO |
|         | Fru      | D/L-Fructose                            | FRU, FRUP      |
|         | Tag      | D-Tagatose                              | TAG, TAGP      |
|         | Sor      | L-Sorbose                               | SOR, SORP      |
|         | Psi      | D/L-Psicose                             | PSI, PSIP      |
| Acidic  | Neu5Ac   | <i>N</i> -acetyl-D-Neuraminic acid      | NE5AC          |
|         | Neu5Gc   | <i>N</i> -glycolyl-D-Neuraminic acid    | NE5GC          |
|         | Neu      | D-Neuraminic acid                       | NEU            |
|         | Kdn      | Deaminoneuraminic acid                  | KDN            |
|         | Kdo      | 2-keto-3-deoxy-D-mannooctanoic acid     | KDO, KDA       |
|         | Dha      | 3-deoxy-D-lyxo-heptopyran-2-ularic acid | DHA            |
| Etc     | LDManHep | L-glycero-D-manno-heptose               | HEP            |
|         | DDManHep | D-glycero-D-manno-heptose               | DHEP           |
|         | MurNAc   | <i>N</i> -acetyl-D-Muramic acid         | MU2AC          |
|         | MurNGc   | <i>N</i> -glycolyl-D-Muramic acid       | MU2GC          |
|         | Mur      | D-Muramic acid                          | MUR            |
|         | Bac      | D-bacillosamine                         | BAC            |

†The  $\alpha$  or  $\beta$  anomeric configuration is designated by adding "A" or "B" in front of each CHARMM residue name.

**Table S2.** Chemical modifications recognized by *Glycan Reader*.

| <b>Modification</b>                                | <b>CHARMM Patch Name</b>                       |
|----------------------------------------------------|------------------------------------------------|
| Phosphate                                          | PH, PHF <sup>\$</sup>                          |
| Pyrophosphate                                      | PPH, PPHF <sup>\$</sup>                        |
| Sulfate                                            | SUF, SUFF <sup>\$</sup>                        |
| Sulfonate (Qui)                                    | SFO                                            |
| Sulfo-amine                                        | NSF                                            |
| Thiol                                              | SH                                             |
| Isopropyl thiol                                    | SPRO                                           |
| Amine                                              | AM                                             |
| O-methyl                                           | OME, COOME <sup>%</sup>                        |
| O-acetyl                                           | OAC                                            |
| N-acetyl                                           | NAC                                            |
| Carboxyl                                           | COO                                            |
| Fluorine                                           | CF, CF2 (for Neu5Ac)                           |
| Ethanolamine phosphate                             | PEA                                            |
| Ethanolamine diphosphate                           | ETPP                                           |
| Glycerol                                           | MGLY                                           |
| Glyceric acid                                      | GLYA                                           |
| Glycine amide                                      | NGF                                            |
| Acyl chain <sup>@</sup>                            | C8, C10, C12 <sup>†</sup>                      |
| S-linked acyl chain <sup>@</sup>                   | SC8, SC10, SC12 <sup>†</sup>                   |
| Ceramide <sup>@</sup>                              | CERA, CERB <sup>‡</sup>                        |
| Diacyl glycerol <sup>@</sup>                       | DAGA, DAGB <sup>‡</sup>                        |
| Phosphatidyl inositol diacyl glycerol <sup>@</sup> | DPINS, INS2A, INS2B, INS6A, INS6B <sup>#</sup> |
| 2,3-diphytanyl glycerol <sup>@</sup>               | DPHGA, DPHGB <sup>†</sup>                      |
| Deoxylation                                        | DEO                                            |

<sup>\$</sup>PHF, PPHF, and SUFF are for furanose.

<sup>%</sup>COOME is for uronic acid.

<sup>†</sup>The numbers 8, 10, and 12 represent the number of carbons in the acyl chain.

<sup>‡</sup>"A" or "B" at the end of each patch name represents the  $\alpha$  or  $\beta$  anomeric configuration of carbohydrates attached to ceramide.

<sup>#</sup>DPINS is the patch between inositol and diacylglycerol; 2 or 6 is the inositol ring carbon position to which carbohydrates are attached; <sup>‡</sup>"A" or "B" represents the  $\alpha$  or  $\beta$  anomeric configuration of carbohydrates attached to inositol.

<sup>@</sup>These 6 templates are used for glycolipid detection; among a total of 25 chemical modifications, there are 19 function groups and 6 glycolipids

**Table S3.** Glycosidic linkages recognized by *Glycan Reader*.

| <b>Linkage<sup>†</sup></b>                       | <b>CHARMM Patch Name</b>                           |
|--------------------------------------------------|----------------------------------------------------|
| $\alpha, \beta$ -Pyr-(1→1)- $\alpha, \beta$ -Pyr | 11AA, 11AB, 11BB, 1S1BB                            |
| $\alpha, \beta$ -Pyr-(1→2)- $\alpha, \beta$ -Pyr | 12AA, 12AB, 12BB, 1S2AA, 1S2AB, 1S2BA, 1S2BB       |
| $\alpha, \beta$ -Pyr-(1→3)- $\alpha, \beta$ -Pyr | 13AA, 13AB, 13BA, 13BB, 1S3AA, 1S3AB, 1S3BA, 1S3BB |
| $\alpha, \beta$ -Pyr-(1→4)- $\alpha, \beta$ -Pyr | 14AA, 14AB, 14BA, 14BB, 1S4AA, 1S4AB, 1S4BA, 1S4BB |
| $\alpha, \beta$ -Pyr-(1→6)- $\alpha, \beta$ -Pyr | 16AB, 16BB, 1S6AT, 1S6BT                           |
| $\alpha, \beta$ -Pyr-(1→6)- $\beta$ -Hep         | MH16AB, MH16BB                                     |
| $\alpha, \beta$ -Pyr-(1→7)- $\alpha$ -Hep        | MH17AT, MH17BT                                     |
| $\alpha, \beta$ -Pyr-(1→5)- $\alpha$ -Ulo        | SA15AA, SA15BA                                     |
| $\alpha$ -Ulo-(2→4)- $\alpha$ -Ulo               | SA24E                                              |
| $\alpha$ -Ulo-(2→6)- $\alpha$ -Pyr               | SA26T                                              |
| $\alpha$ -Ulo-(2→8)- $\alpha$ -Ulo               | SA28T                                              |
| $\alpha$ -Sia-(2→3)- $\alpha, \beta$ -Pyr        | SA23A                                              |
| $\alpha$ -Sia-(2→6)- $\alpha, \beta$ -Pyr        | SA26T                                              |
| $\alpha$ -Sia-(2→8)- $\alpha$ -Sia               | SA28E                                              |
| $\alpha$ -Sia-(2→9)- $\alpha$ -Sia               | SA29E                                              |
| $\alpha$ -Pyr-(1→2)- $\beta$ -UloF               | FP21BA                                             |
| $\beta$ -UloF-(2→1)- $\beta$ -UloF               | FF21BB                                             |
| $\beta$ -UloF-(2→6)- $\beta$ -UloF               | FF26BB                                             |
| $\alpha$ -Fur-(1→2)- $\beta$ -Pyr                | FP12AB                                             |
| $\alpha$ -Fur-(1→3)- $\beta$ -Pyr                | FP13AB                                             |
| $\beta$ -Fur-(1→2)- $\alpha$ -Fur                | FF12BA                                             |
| $\alpha$ -Fur-(1→3)- $\alpha$ -Fur               | FF13AA                                             |
| $\alpha$ -Fur-(1→5)- $\alpha$ -Fur               | FF15AT                                             |

<sup>†</sup>Pyr is for pyranose; Hep for heptopyranose; Ulo for octulosonic acid; Sia for sialic acid; UloF for hex-2-ulofuranose; Fur for pentofuranose.

**Table S4.** Undefined chemical modifications that appear in more than 10 PDB entries.

| # PDB entries | # molecule | Description             | Structure / Representative PDB ID                                                                       |
|---------------|------------|-------------------------|---------------------------------------------------------------------------------------------------------|
| 50            | 97         | Acarbose                | 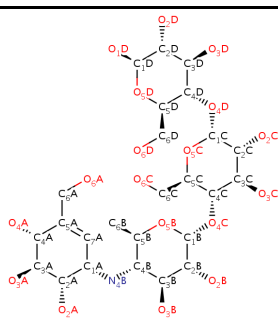 <p>PDB ID: 4BQF</p>  |
| 47            | 117        | Nitrophenyl-D-glucoside |  <p>PDBID: 1VAL</p>   |
| 22            | 48         | Zanamivir               |  <p>PDBID: 4CPN</p>  |
| 22            | 28         | Daunorubicin            |  <p>PDBID: 381D</p> |

19 29 Cellobiose-like Isofagomine

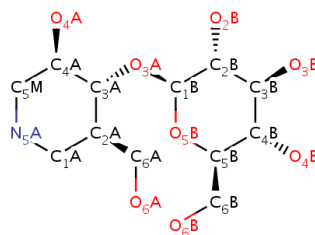

PDBID: 3RX8

17 55 Vancomycin

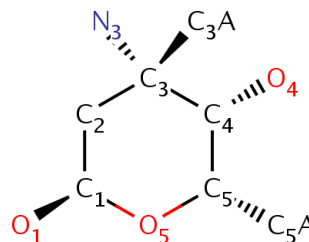

PDBID: 1PNV

14 25 (5-bromo-4-chloro-3-indolyl)-  
D-mannose

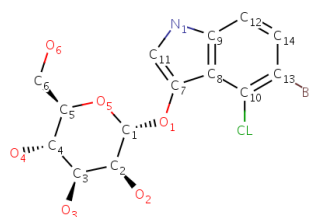

PDBID: 3AX4

13 16 6-O-alpha-D-glucopyranosyl-  
D-fructose

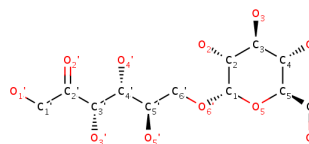

PDBID: 4HA1

11 15 1,2-deoxy-2-fluoro-  
xylopyranose

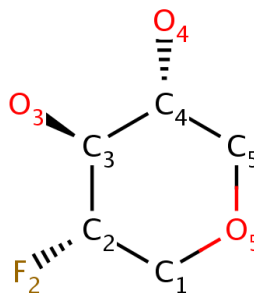

PDBID: 1C5I

11 19 Allosamidin

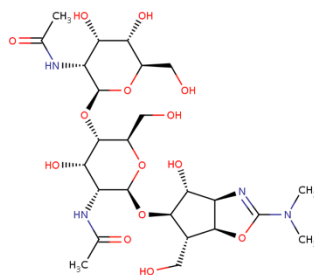

PDBID: 1X6N

11 16 2,3- epoxypropyl-alpha-D-glucopyranoside

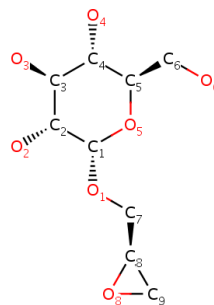

PDBID: 1J11

10 12 Doxorubicin

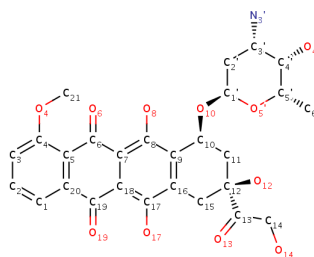

PDBID: 4DX7

---



**Table S5.** *Glycan Reader*-recognized structural errors among 10,731 PDB glycan chains.

| <b>Error type</b>                   | <b>Number of PDB entries</b> | <b>PDB Example</b> |
|-------------------------------------|------------------------------|--------------------|
| Missing Oxygen (at anomeric carbon) | 285                          | 4MYV               |
| Missing Glycosidic Linkages         | 339                          | 2Y1K               |
| Surplus Glycosidic Linkages         | 55                           | 1MQL               |
| Bond Distance > 2.0 Å               | 85                           | 1QFG               |
| Overlapping Atoms                   | 8                            | 4KQM               |
|                                     | <b>624 (5.81%)</b>           |                    |

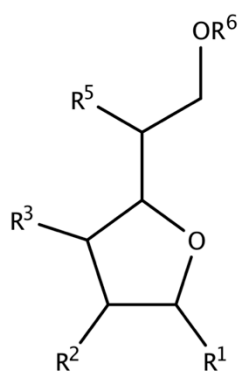

**Hexofuranose**

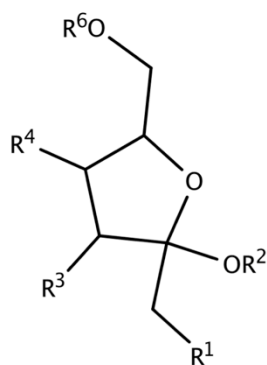

**Hex-2-ulofuranose**

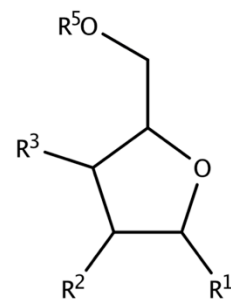

**pentofuranose**

**Figure S1.** The template graphs of five-membered rings to identify the backbone atoms through VF2 isomorphism. R is the available position of chemical modifications.

## 1. Specify PDB Entry

Download PDB File:  Download Source:

Upload PDB File:  No file chosen

PDB Format:  PDB  PDBx/mmCIF  CHARMM

Next Step:  
Select Model/Chain

## 2. Model Selection

### Model/Chain Selection Option:

Click on the chains you want to select.

Select Model #

| Type                                        | SEGID | PDB ID | Residue ID                                                                                           | First | Last | Engineered Residues |
|---------------------------------------------|-------|--------|------------------------------------------------------------------------------------------------------|-------|------|---------------------|
| <input checked="" type="checkbox"/> Protein | PROA  | A      | 19                                                                                                   | 723   | None |                     |
| <input checked="" type="checkbox"/> Glycan  | CARA  | B      | aDGal(1→3)<br>[aDGal(1→6)]aDGlc(1→3)bDDHep(1→3)aLDHep(1→5)<br>[aDKdo(2→4)]aDKdo(2→6)aDGlc(1→6)aDGlcN |       |      |                     |

CHARMM-GUI uses internal segid format PRO[A-Z] (protein), DNA[A-Z] (DNA), RNA[A-Z] (RNA), and HET[A-Z] (ligands), instead of PDB chain id.

Next Step:  
Manipulate PDB

## 3. Manipulate Glycosylation

### PDB Manipulation Options:

- Terminal group patching:
- Model missing residues:
- Preserve hydrogen coordinates:
- Mutation:
- Protonation:
- Disulfide bonds:
- Phosphorylation:
- Glycosylation / Glycan Ligand(s):

CARA glycolipid  aDGal(1→3)[aDGal(1→6)]aDGlc(1→3)bDDHep(1→3)aLDHep(1→5)  
[aDKdo(2→4)]aDKdo(2→6)aDGlc(1→6)aDGlcN

### Symmetry Operation Options:

- Generation of Crystal Packing: Space Group P 61 6 (this is required for asymmetric unit solvation)
- Generation of Full Unit Cell: Space Group P 61 6

Next Step:  
Generate PDB

## 4. User-specified Edit

### Glycosylation / Glycan Ligand(s)

aDGal(1→3)[aDGal(1→6)]aDGlc(1→3)bDDHep(1→3)aLDHep(1→5)[aDKdo(2→4)]aDKdo(2→6)aDGlc(1→6)aDGlcN

### Glycan Sequence:

Name:

|   |    |                                        |
|---|----|----------------------------------------|
| 1 | α  | D-glucosamine                          |
| 2 | 6→ | D-glucosamine                          |
| 3 | 6→ | 2-keto-3-deoxy-D-mannooctulosonic acid |
| 4 | 4→ | 2-keto-3-deoxy-D-mannooctulosonic acid |
| 5 | 5→ | LD-mannose                             |
| 6 | 3→ | LD-mannose                             |
| 7 | 3→ | D-glucose                              |
| 8 | 3→ | D-galactose                            |
| 9 | 6→ | D-galactose                            |

Chemical modification:

| Residue ID | Site | Modification                     | Add chemical modification |
|------------|------|----------------------------------|---------------------------|
| 2          | 2    | N-linked acyl chain II (lipid A) | <input type="checkbox"/>  |
| 2          | 3    | O-linked acyl chain II (lipid A) | <input type="checkbox"/>  |
| 2          | 4    | Phosphorylation                  | <input type="checkbox"/>  |
| 1          | 1    | Phosphorylation                  | <input type="checkbox"/>  |
| 1          | 2    | N-linked acyl chain I (lipid A)  | <input type="checkbox"/>  |
| 1          | 3    | O-linked acyl chain I (lipid A)  | <input type="checkbox"/>  |
| 5          | 4    | Ethanolamine diphosphate         | <input type="checkbox"/>  |
| 6          | 4    | Phosphorylation                  | <input type="checkbox"/>  |

### Sequence Graph:

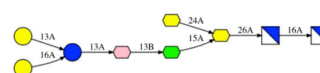

Next Step:  
Update Sequence

## 5. Download Models

PDB Info

Original PDB File: [2FCP.cif](#)

Individual Chains: [2fcp\\_proa.pdb](#)  
[2fcp\\_cara.pdb](#)

CHARMM Input: [step1\\_pdbreader.inp](#)

CHARMM Output: [step1\\_pdbreader.out](#)

CHARMM PDB: [step1\\_pdbreader.pdb](#) ([view structure](#))

CHARMM CRD: [step1\\_pdbreader.crd](#)

CHARMM PSF: [step1\\_pdbreader.psf](#)

XPLOR PSF: [step1\\_pdbreader.xplor.psf](#)

### Computed Energy:

Please beware of that the computed energy is CHARMM single-point energy and is displayed to make sure all the coordinates are defined.

| ENER         | ENR1         | Eval#        | ENERgy    | Delta-E     | GNRS    | DIRGdzala | IMPropers |
|--------------|--------------|--------------|-----------|-------------|---------|-----------|-----------|
| ENER         | INTERH       | BONDS        | ANGLes    | UKRY-D      | PROZD   | PROSO     |           |
| ENER         | CROSS        | CHAPS        | HFID      | HBONds      | ADP     | UBER      |           |
| ENER         | EXTENH       | VDWals       | ELEC      |             |         |           |           |
| ENER=        | 0            | 2088430.8837 | 0.0000    | 243537.6988 |         |           |           |
| ENER INTERH= | 816.79605    | 1428.24687   | 138.43473 | 1094.36280  | 6.21735 |           |           |
| ENER CROSS=  | +234.39771   | 0.00000      | 0.00000   | 0.00000     |         |           |           |
| ENER EXTENH= | 2589322.4741 | -10041.65000 | 0.00000   | 0.00000     |         |           |           |

**Figure S2.** Step-by-step illustration of *Glycan Reader* in CHARMM-GUI: (1) One can upload a PDB file or specify a PDB entry. PDB ID: 2FCP is used as an example. (2) All protein and glycan chains are displayed and selected as a default. (3) Selected glycans are displayed in the PDB Manipulation page, and the edit button (red box) is provided for the glycan manipulation. (4) Upon user's click on the edit button, *Glycosylation / Glycan Ligand(s) Manipulator* is displayed in a new pop-up window, and one can edit the glycosylation and glycan sequence. (5) Finally, one can download structure (PDB and CRD) and data (PSF) files. In the case that a user wants to build a solvated or membrane system containing glycans, the user can use *Quick MD Simulator* or *Membrane Builder* and follow the same PDB reading steps. At the end of these modules, one can obtain the equilibration and production input files for CHARMM, NAMD, GROMACS, AMBER, GENESIS, LAMMPS, Desmond, OpenMM, and CHARMM/ OpenMM.

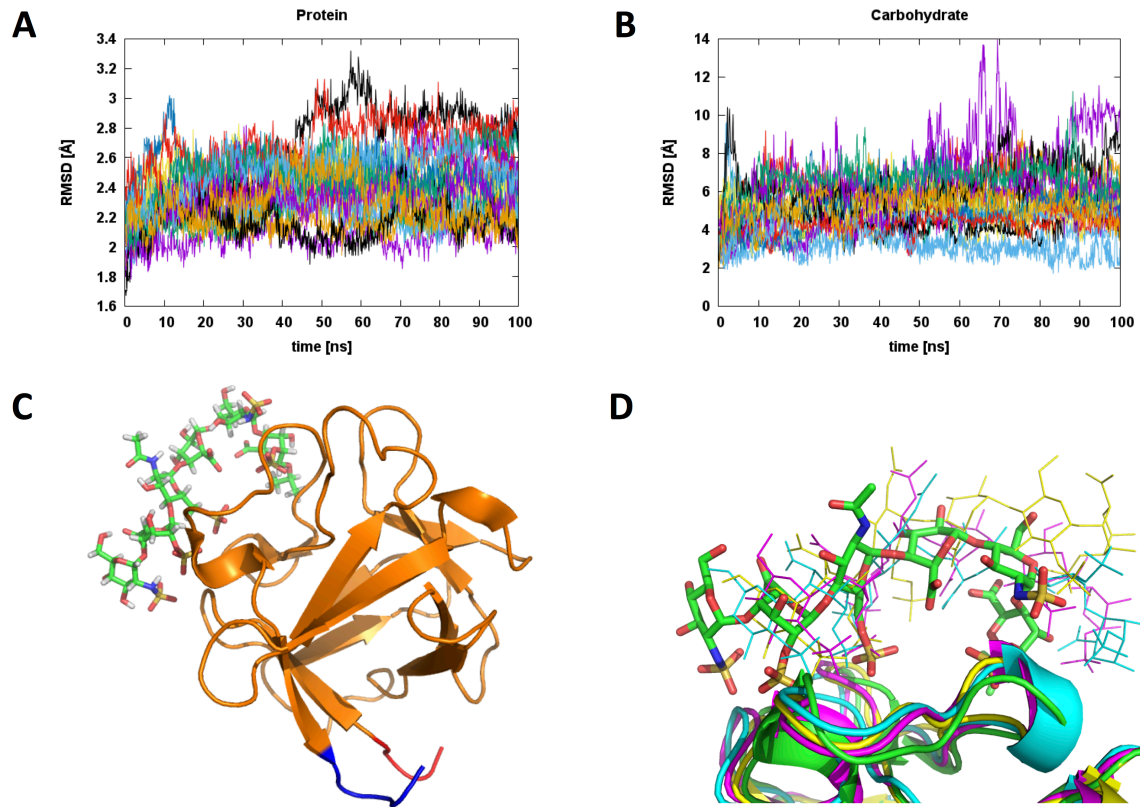

**Figure S3.** (A and B) RMSD time-series of FGF-1 monomer and heparin analogue. The FGF-1 RMSDs were measured for residue id 26 to 149, excluding (C) the N-terminal (22-25) and C-terminal (150-154) loops due to the high flexibility (gray). Note that the heparin RMSDs were measured after FGF-1 was first superposed to each initial NMR structure. (D) Heparin analogue structures obtained from 10-ns (cyan), 20-ns (magenta), and 50-ns (yellow) snapshots. Green is the initial heparin structure.

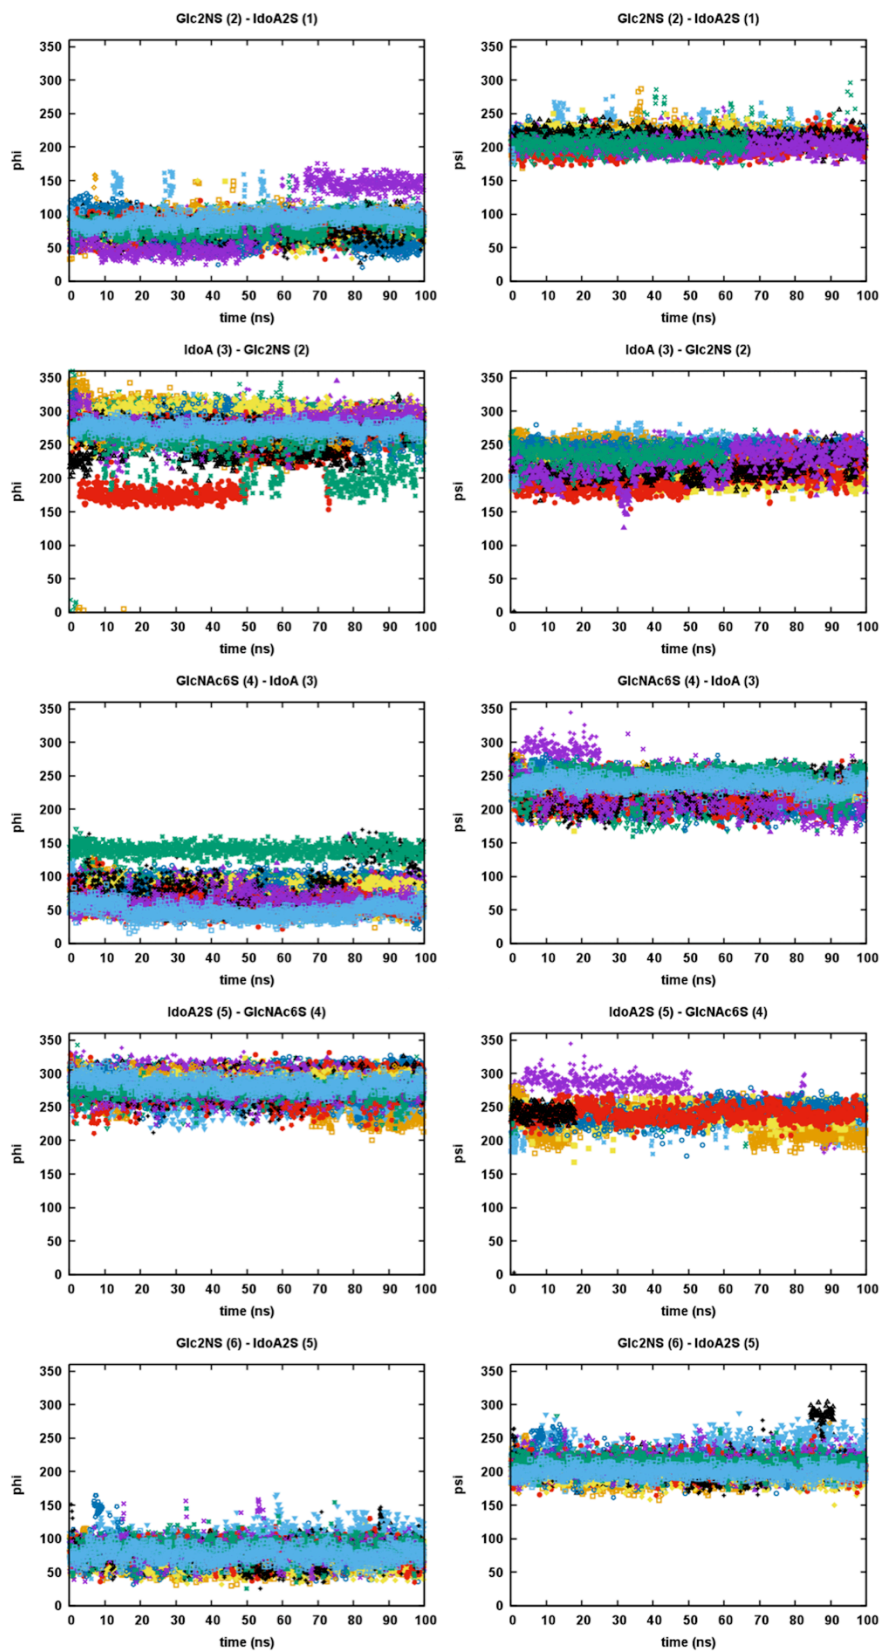

**Figure S4.** Time-series of each  $\phi$  and  $\psi$  glycosidic dihedral angle.

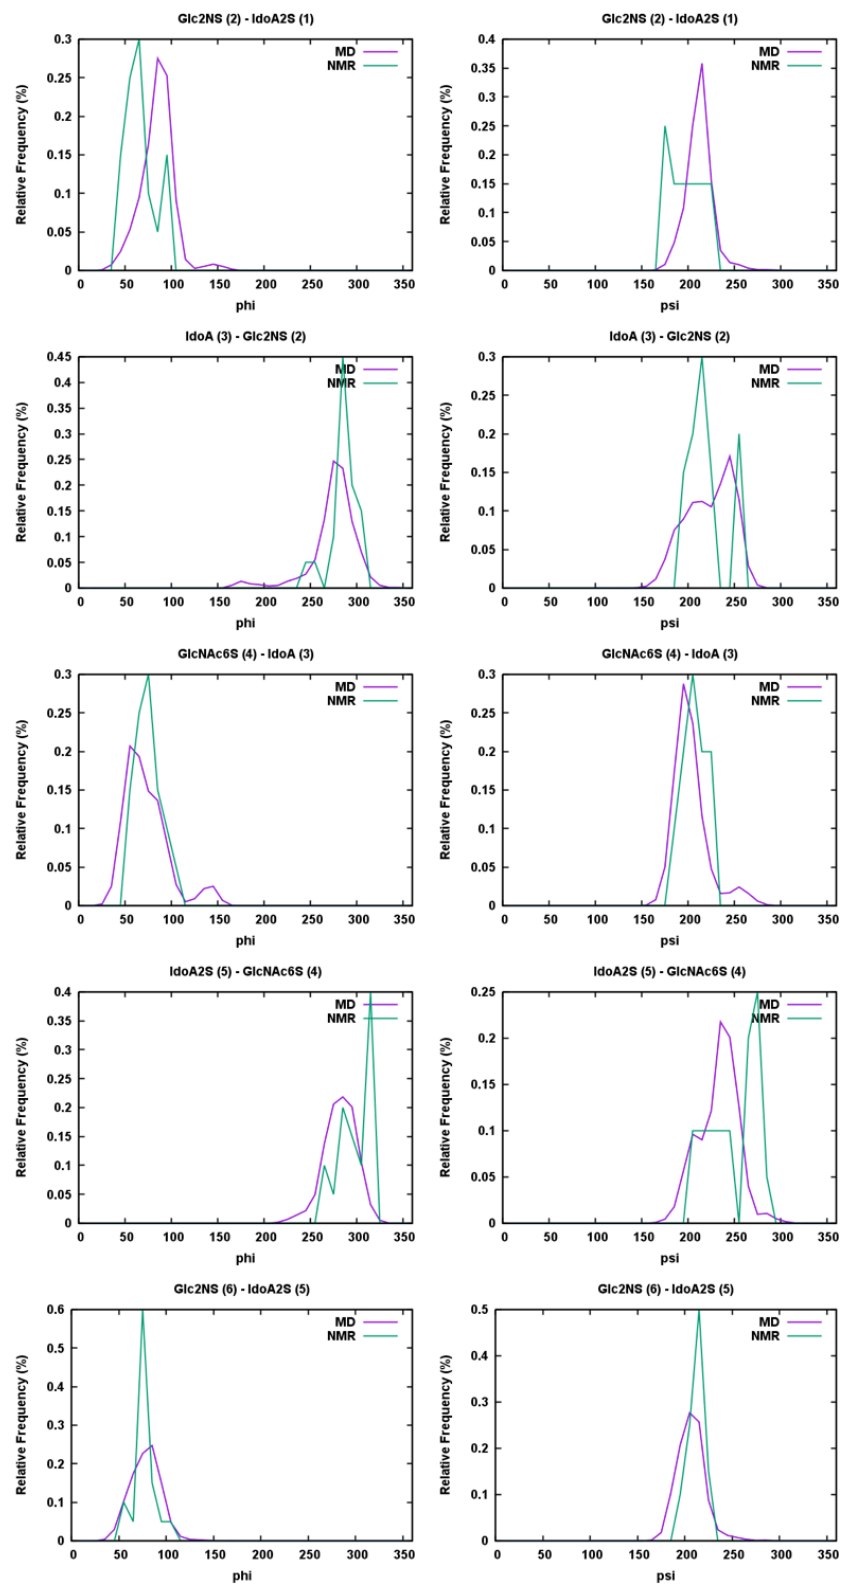

**Figure S5.** Frequency distribution curves of  $\phi$  and  $\psi$  angles obtained from the MD simulations in comparison with those calculated from the 20 NMR models.
